# Supplementary material for: Multifunctional porous Tröger's base polymers with tetraphenylethene units: CO2adsorption, luminescence and sensing properties
Source: Royal Society of Chemistry journal article supplement (doi:10.1039/c7py00856b), 2017-01-01
Supplement: c7py00856b1.pdf [file c7py00856b1.pdf]

**Multifunctional porous Tröger's base polymer with tetraphenylethene unit: CO<sub>2</sub>  
adsorption, luminescence and sensing property**

Yuanzheng Cui, Yuchuan Liu, Jiancong Liu, Jianfeng Du, Yue Yu, Shun Wang,  
Zhiqiang Liang\* and Jihong Yu\*

State Key Lab of Inorganic Synthesis and Preparative Chemistry, Jilin University,  
Changchun, 130012, P. R. China

E-mail: [liangzq@jlu.edu.cn](mailto:liangzq@jlu.edu.cn); [jihong@jlu.edu.cn](mailto:jihong@jlu.edu.cn).

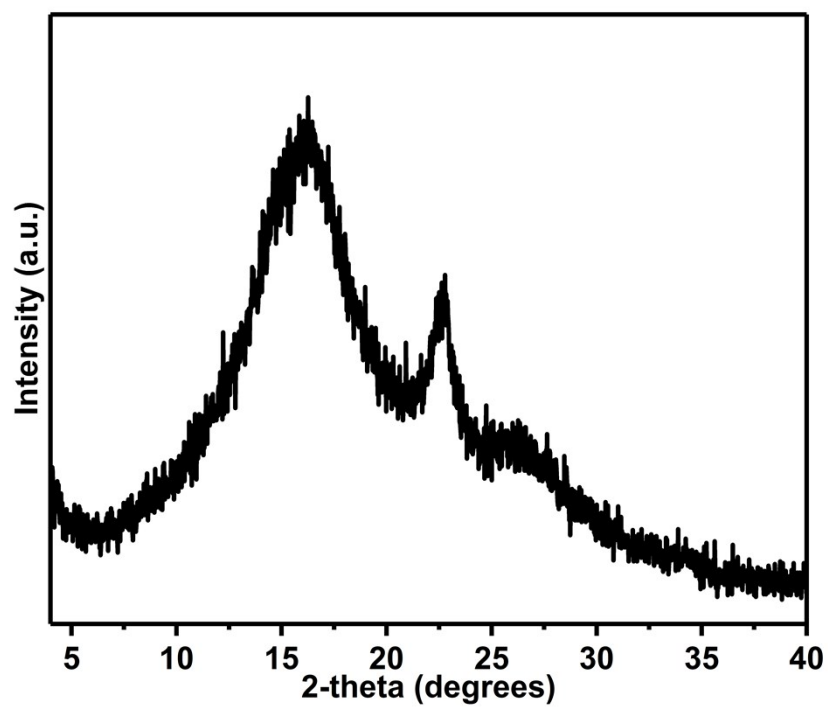

**Fig. S1** Experimental powder X-ray diffraction PXRD pattern of **LMOP-15**

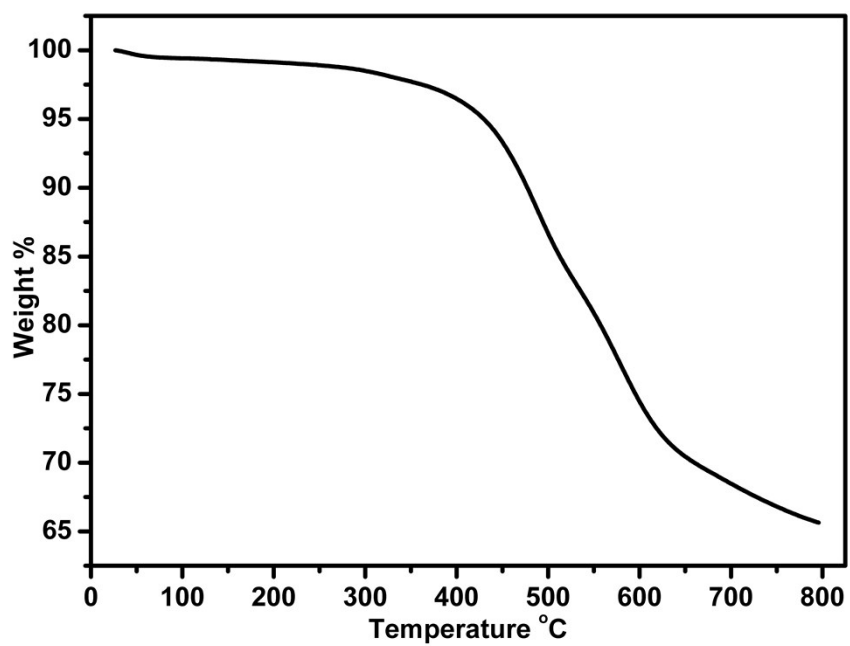

**Fig. S2** TGA curve of **LMOP-15** under  $N_2$ .

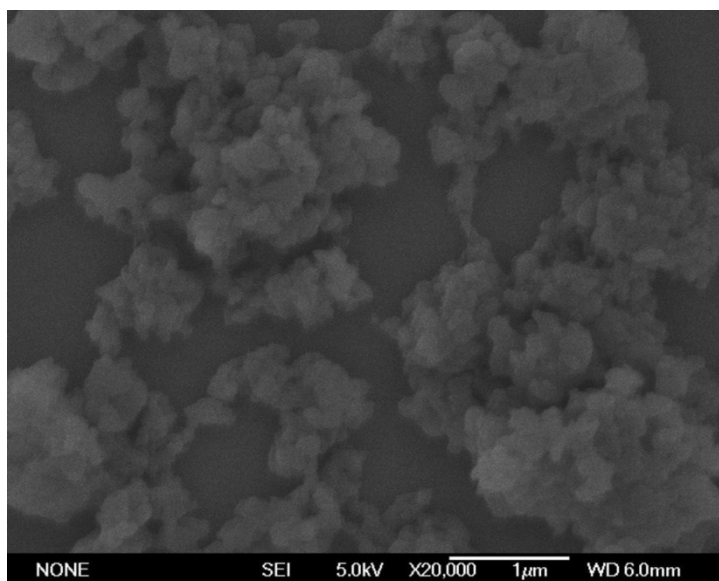

**Fig. S3** SEM images of LMOP-15.

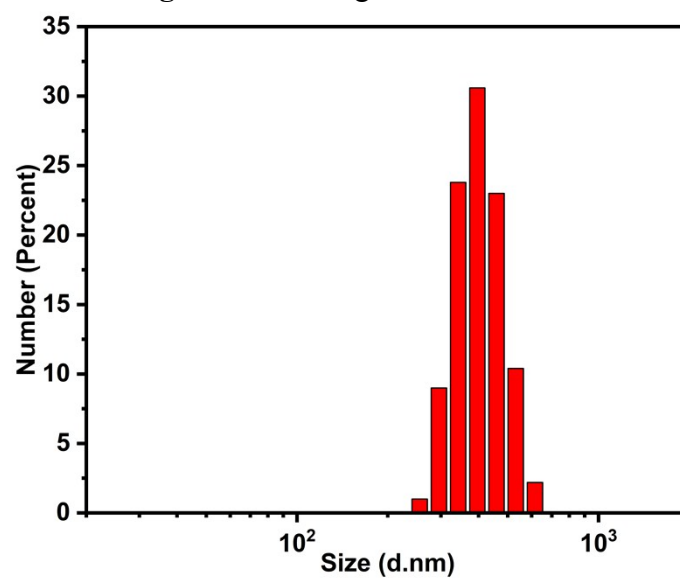

**Fig. S4** Size distribution of LMOP-15 in EtOH (0.1 mg/mL) determined by DLS analysis

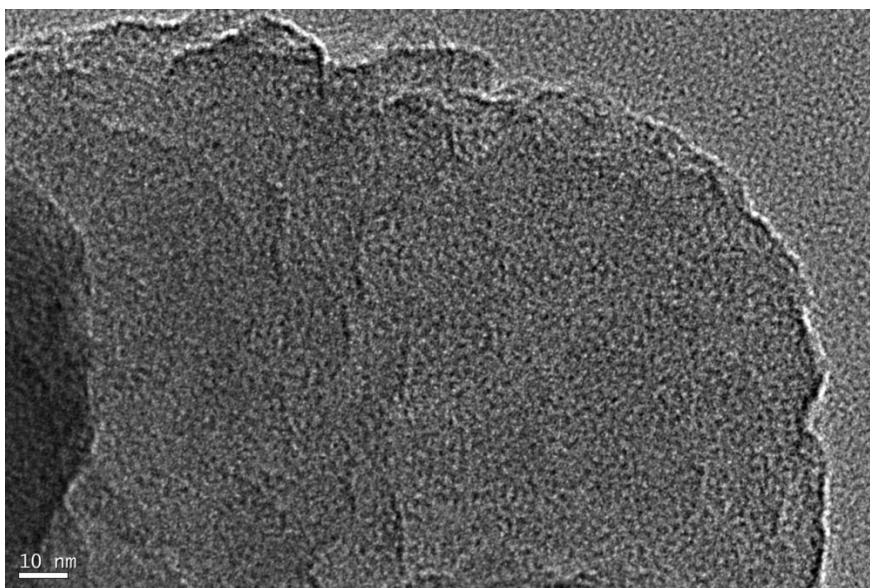

**Fig. S5** TEM images of LMOP-15.

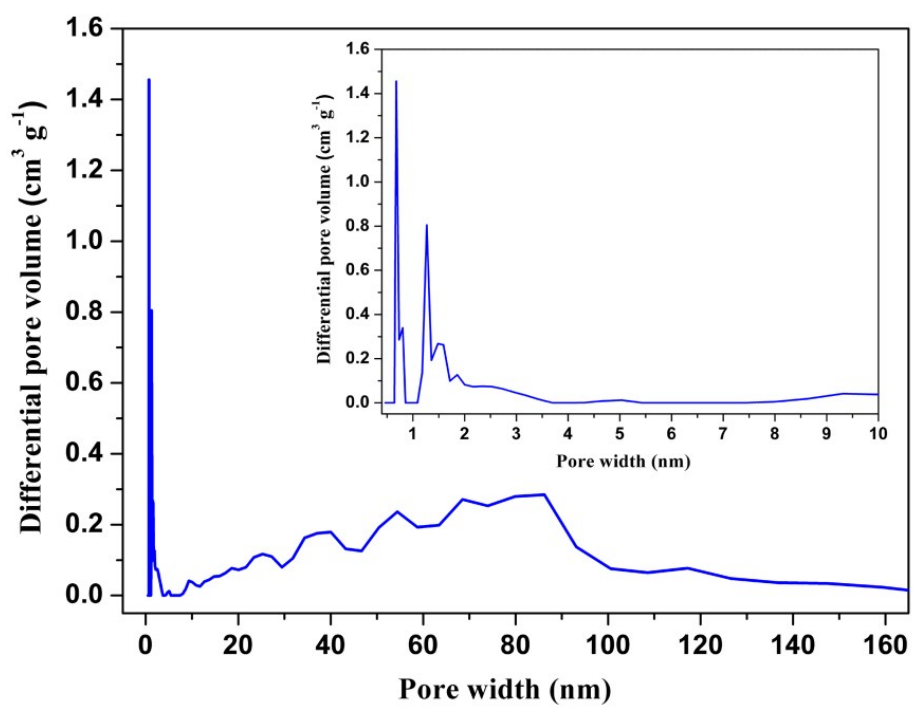

**Fig. S6** Pore size distribution of LMOP-15.

## Heat of CO<sub>2</sub> Adsorption Calculation

The isosteric heats ( $Q_{st}$ ) of adsorption for **LMOP-15** were calculated by fitting the CO<sub>2</sub> adsorption isotherms measured at 273 K, 283 K and 298 K to the Virial equation.

$$\ln P = \ln N + \frac{1}{T} \sum_{i=0}^m a_i N_i + \sum_{i=0}^n b_j N_i$$

$$Q_{st} = -R \sum_{i=0}^m a_i N_i$$

$N$ : adsorbed volume (cm<sup>3</sup>/g);

$P$ : pressure (mmHg);

$T$ : temperature (K);

$a_i, b_j$ : constants;

$R$ : 8.314 J·mol<sup>-1</sup>·K<sup>-1</sup>

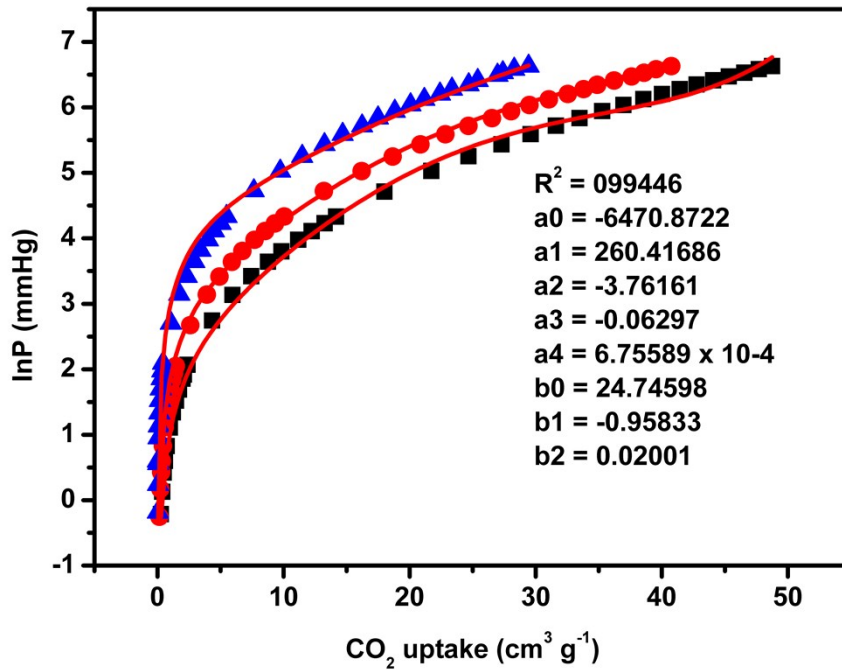

Fig. S7 Virial fitting for CO<sub>2</sub> isotherms of **LMOP-15**.

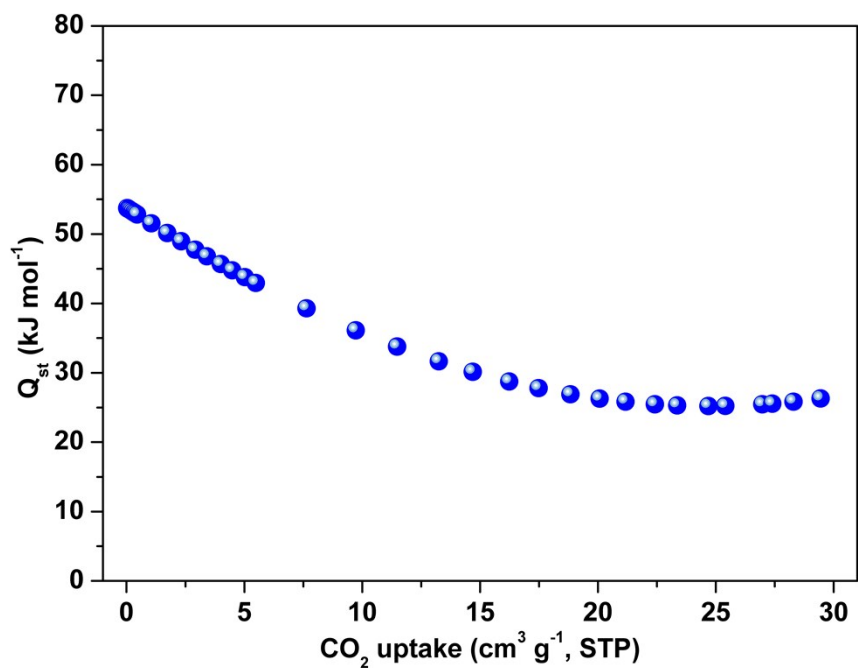

Fig. S8 The isosteric heat of adsorption for LMOP-15.

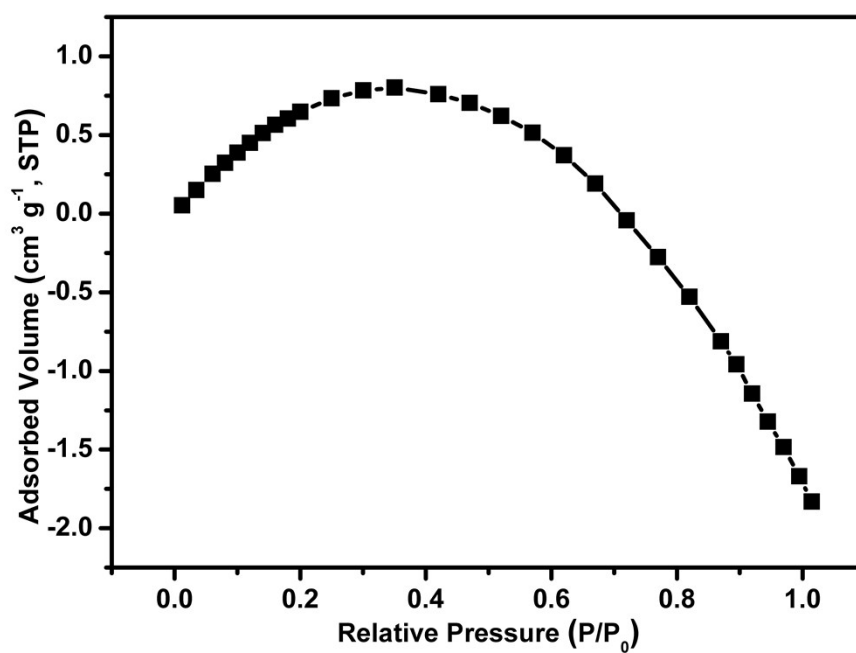

Fig. S9 Nitrogen adsorption isotherm at 273 K of LMOP-15.

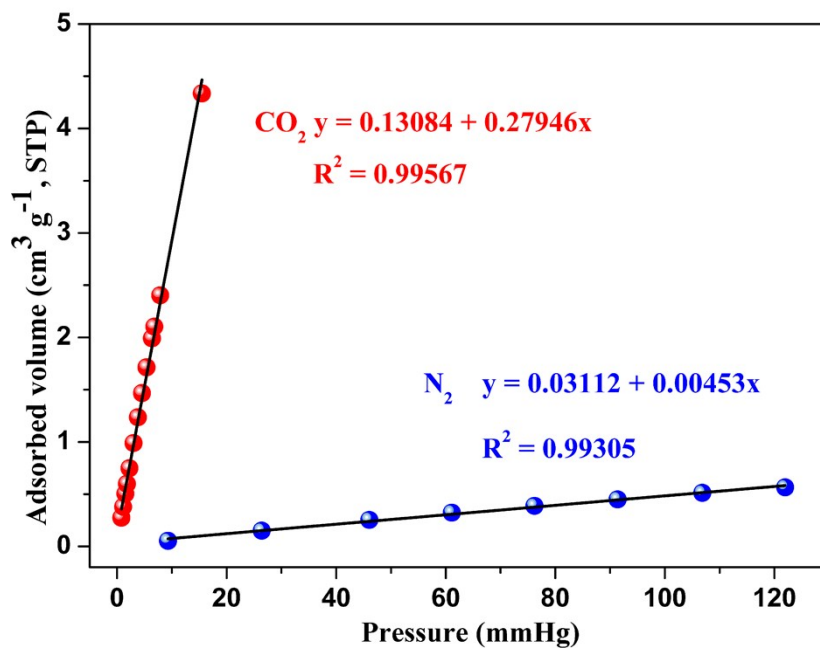

**Fig. S10** CO<sub>2</sub>/N<sub>2</sub> selectivity for **LMOP-15** at 273 K calculated using the Henry's Law constants in the linear low pressure range.

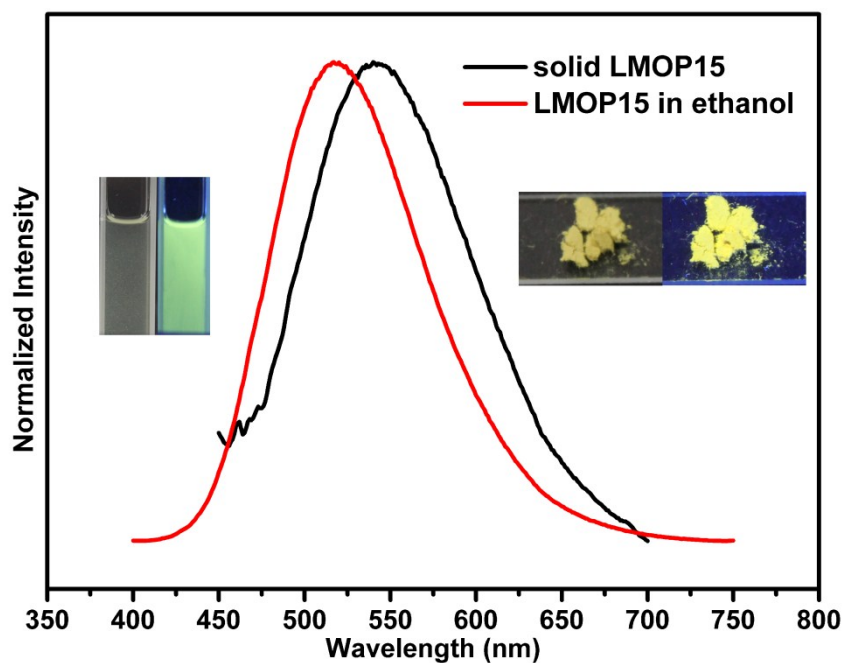

**Fig. S11** Luminescent spectra of **LMOP-15** ( $\lambda_{\text{ex}} = 380$  nm) in solid state, as well as **LMOP-15** dispersed in ethanol (0.1 mg/mL). The photographs were taken under visible light and UV light illumination (365 nm).

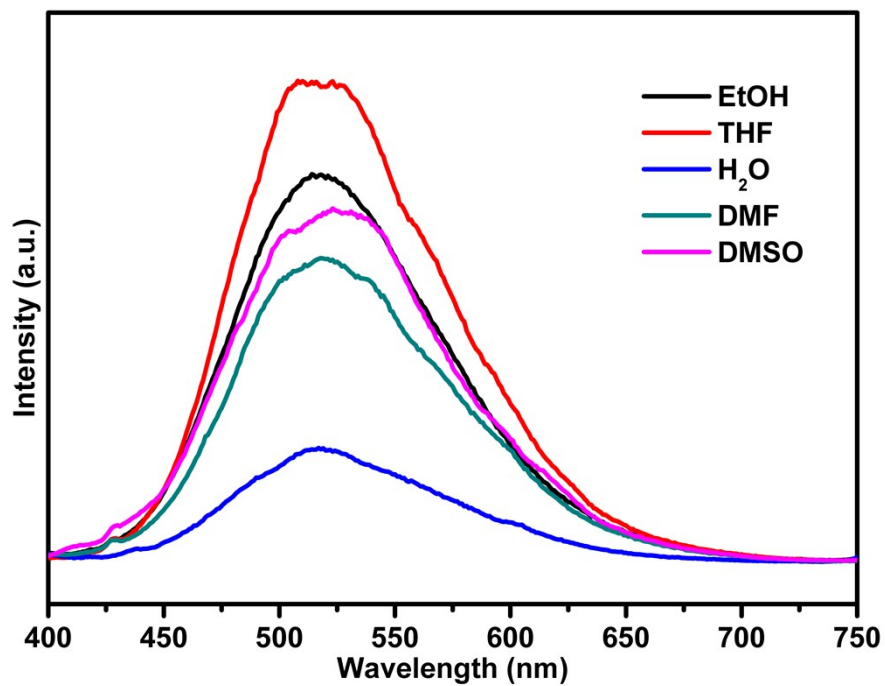

**Fig. S12** Luminescent spectra of LMOP-15 ( $\lambda_{\text{ex}} = 380$  nm) in different solvents (0.1 mg/mL).



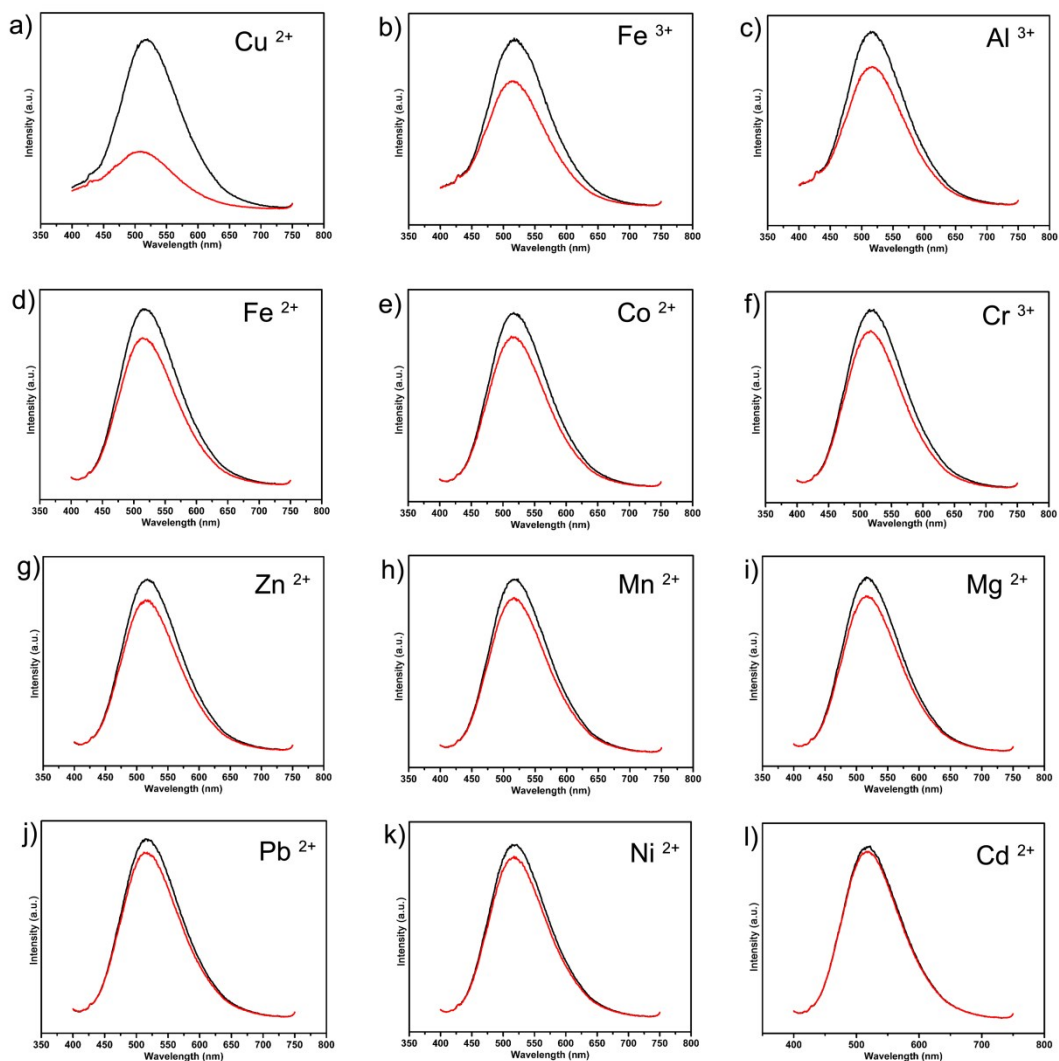

**Fig. S13** Fluorescent titrations of **LMOP-15** dispersed in ethanol solution (0.1 mg/mL) with the addition of different metal ions in ethanol with a concentration of 5.9  $\mu\text{M}$  ( $\lambda_{\text{ex}} = 380 \text{ nm}$ ). The slit width for excitation and emission is 2.5 nm and 2.5 nm, respectively.

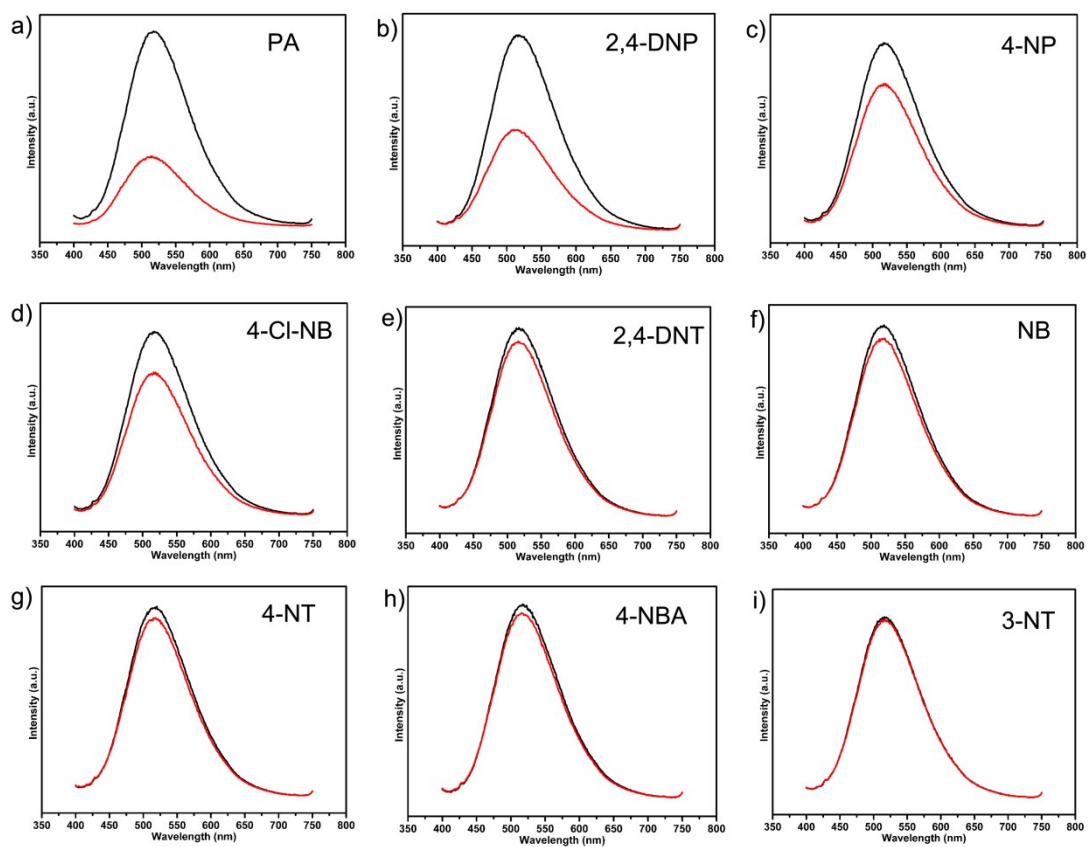

**Fig. S14** Fluorescent titrations of **LMOP-15** dispersed in ethanol solution (0.1 mg/mL) with the addition of NACs in ethanol with a concentration of 47.62  $\mu\text{M}$  ( $\lambda_{\text{ex}} = 380$  nm). The slit width for excitation and emission is 2.5 nm and 2.5 nm, respectively.

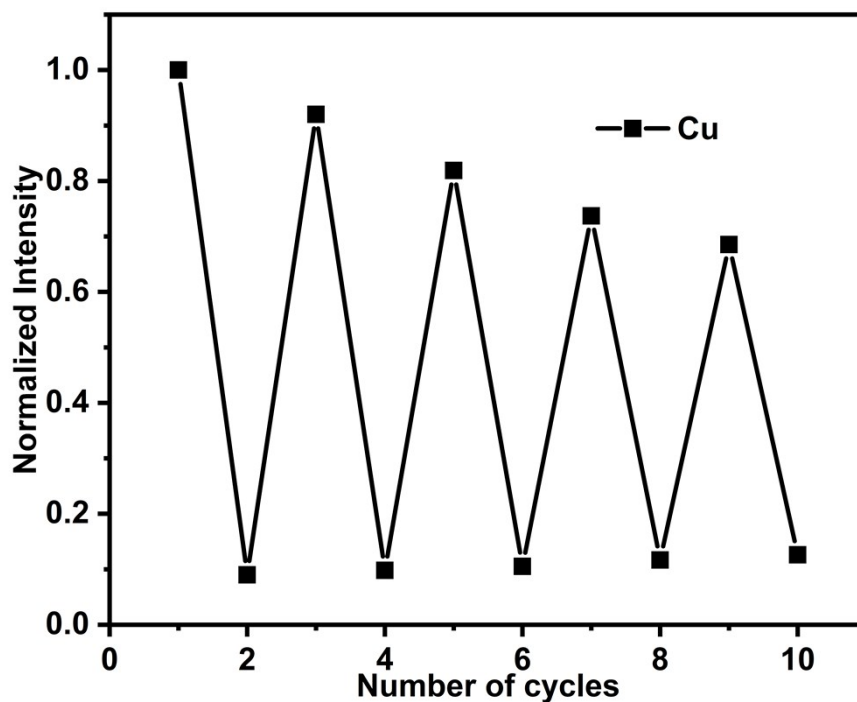

**Fig. S15** The quenching and recovery test of LMOP-15 dispersed in ethanol in the presence of Cu<sup>2+</sup> solution (13.6 μM).

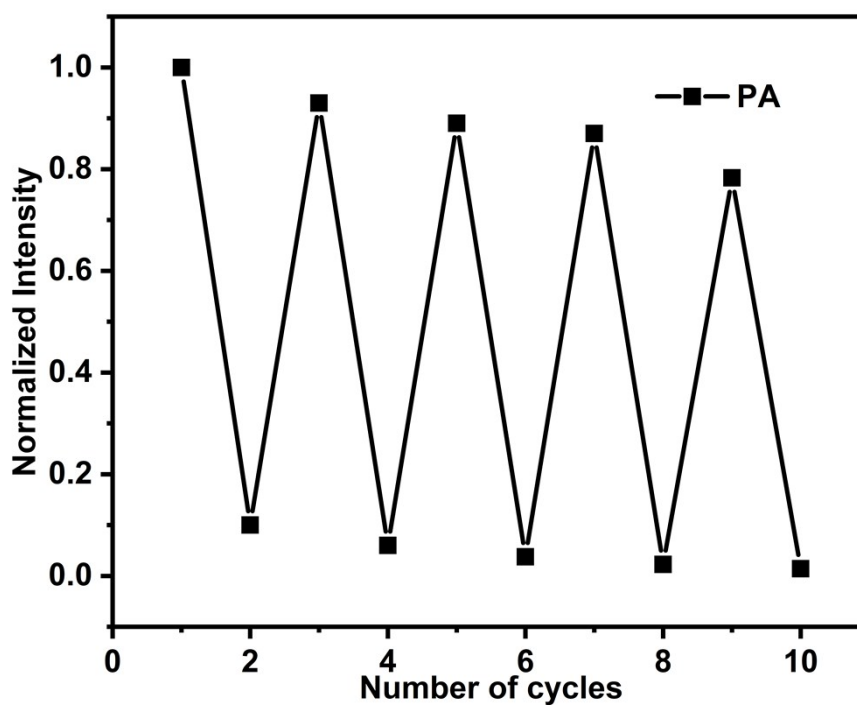

**Fig. S16** The quenching and recovery test of LMOP-15 dispersed in ethanol in the presence of PA solution (90.9 μM).

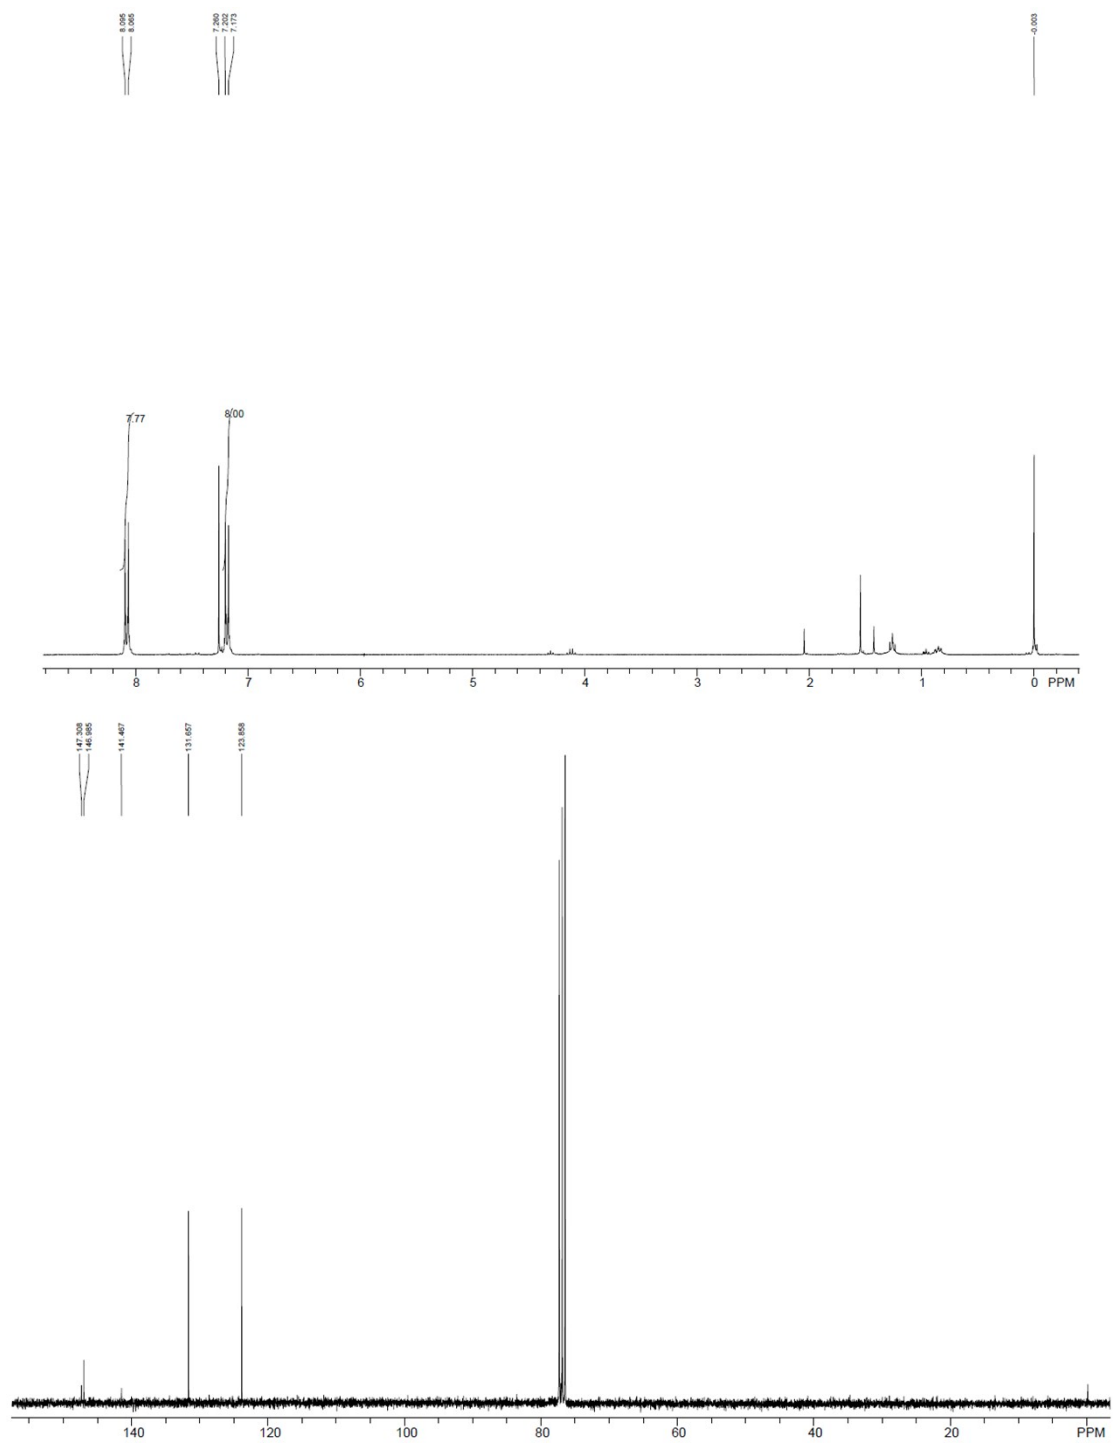

**Fig. S17**  $^1\text{H}$  and  $^{13}\text{C}$  NMR spectra of 1,1,2,2-tetrakis(4-nitrophenyl)ethene (TNPE).

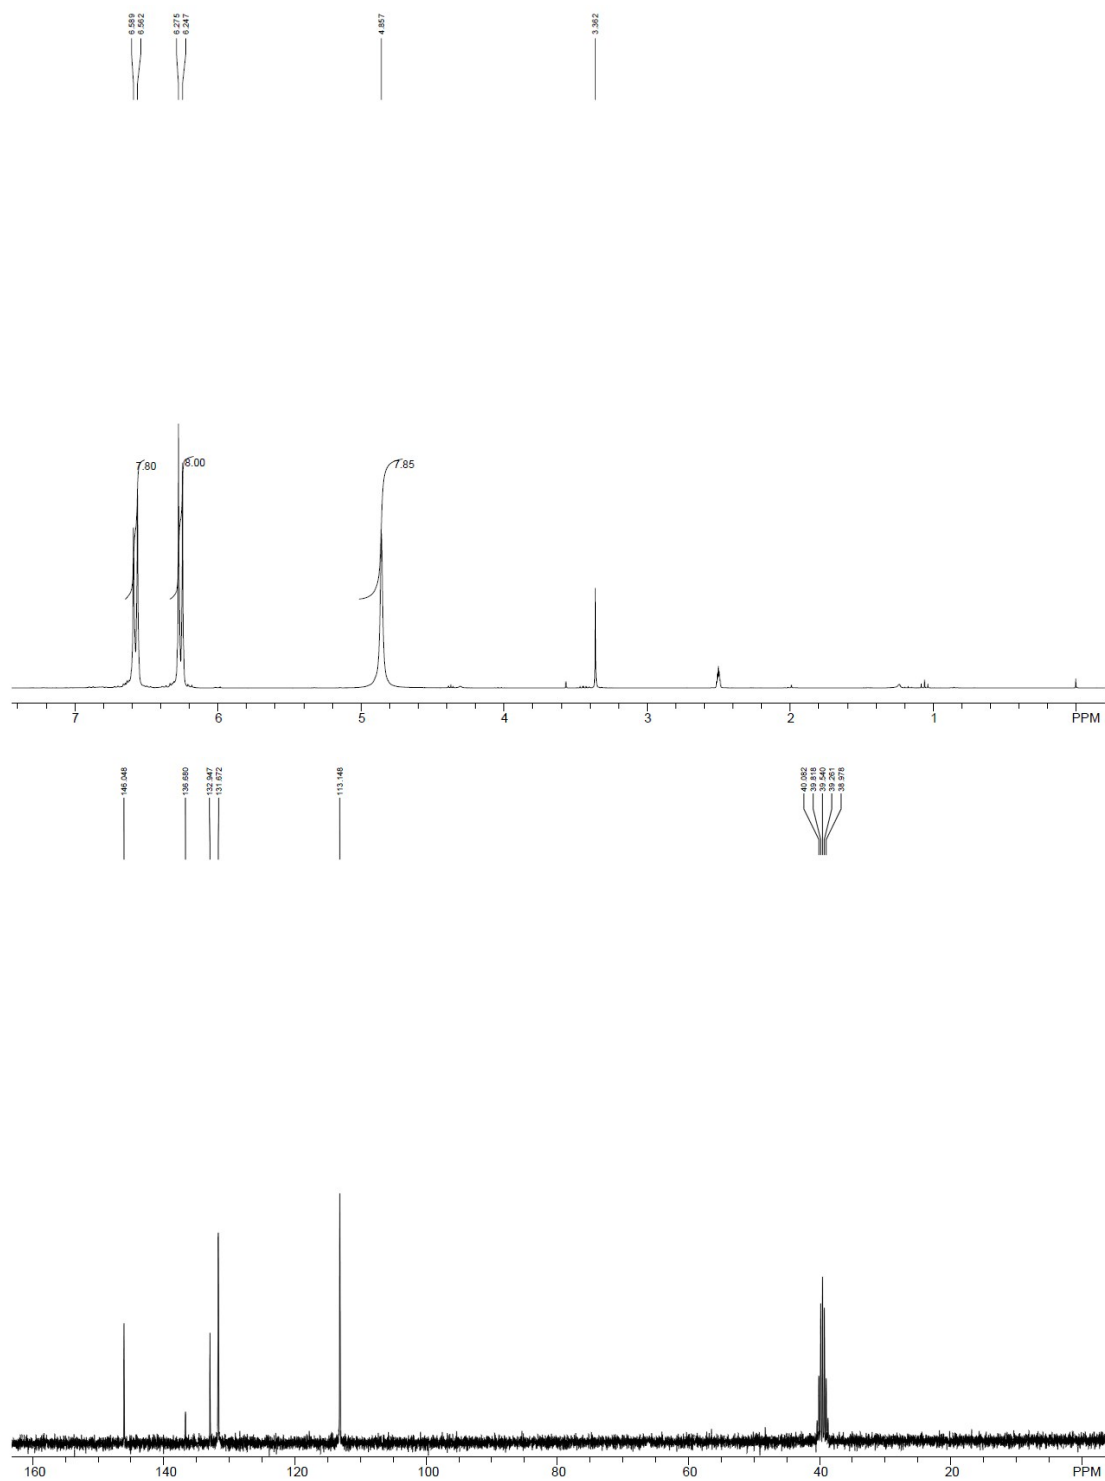

**Fig. S18**  $^1\text{H}$  and  $^{13}\text{C}$  NMR spectra of 1,1,2,2-tetrakis(4-aminophenyl)ethene (TAPE).

**Table S1** Elemental analysis of **LMOP-15**.

| Element | LMOP-15 | Calculated |
|---------|---------|------------|
| C [%]   | 78.57   | 81.79      |
| H [%]   | 5.79    | 5.49       |
| N [%]   | 10.53   | 12.72      |

**Limit of detection (LOD) Calculation**

Limit of detection of was determined according to the following definitions:

$$S_b = \sqrt{\frac{\sum_{i=1}^n (x_i - \bar{x})^2}{n - 1}} \quad (1)$$

$$S = \frac{\Delta I}{\Delta c} \quad (2)$$

$$LOD = \frac{3S_b}{S} \quad (3)$$

Firstly, the standard deviation ( $S_b$ ) was calculated by measuring the fluorescence intensity of **LMOP-15** in ethanol for 11 times and then got the average intensity ( $\bar{x}$ ). By fitting the data into equation (1), the value of standard deviation ( $S_b$ ) was obtained. Secondly, a certain amount of picric acid was added into the solvent and the resulting variation of the intensity ( $\Delta I$ ) was recorded. By fitting the data into equation (2), where  $\Delta I$  is the variation of intensity, and  $\Delta c$  is the variation of quencher concentration, the value of precision  $S$  was calculated. Finally the LOD was calculated according to Function (3). The LODs of **LMOP-15** for  $\text{Cu}^{2+}$  and PA are  $5.1 \times 10^{-8}$  M and  $3.3 \times 10^{-7}$  M, respectively.
